# Supplementary material for: Molecular Characterization of Dengue Virus Strains from the 2019–2020 Epidemic in Hanoi, Vietnam
Source: MDPI journal article supplement (doi:10.3390/microorganisms11051267), 2023-05-11

**Table S1** PCR and sequencing primers targeting envelope gene region.

| Target                | Application          | Primer    | Sequence 5'-3'            | Size (bp) | Annealing Temp |
|-----------------------|----------------------|-----------|---------------------------|-----------|----------------|
| DENV-1 First product  | 1°PCR                | D1-762F   | CGTGGATGTCYTCTGAAGG       | 957       | 50 °C          |
|                       |                      | D1-1719R  | GTGTGCATTGCTCCTTCTTG      |           |                |
|                       | 2°PCR and Sequencing | D1-820F   | GAGACACCCAGGATTCACG       | 899       | 55 °C          |
|                       |                      | D1-1719R  | GTGTGCATTGCTCCTTCTTG      |           |                |
| DENV-1 Second product | 1°PCR                | D1-1643F  | CTGGTGACATTTAAGACAGCT     | 916       | 50 °C          |
|                       |                      | D1-2559R  | CCRATGGCYGCTGAYAGTCT      |           |                |
|                       | 2°PCR and Sequencing | D1-1643F  | CTGGTGACATTTAAGACAGCT     | 876       | 55 °C          |
|                       |                      | D1-2516R  | TGTATTGCTCTGTCCAAGTG      |           |                |
| DENV-2 First product  | 1°PCR                | D2-618F   | ACCAGAAGACATAGATTGTTGGTGC | 977       | 50 °C          |
|                       |                      | D2-1595R  | CATGGTAAYGGCAGGTCT        |           |                |
|                       | 2°PCR and Sequencing | D2-865Fx  | ACCATAGGRACRACAYATTTCC    | 730       | 55 °C          |
|                       |                      | D2-1595R  | CATGGTAAYGGCAGGTCT        |           |                |
| DENV-2 Second product | 1°PCR                | D2-1577Fx | TAGACCTGCCRTTACCATG       | 897       | 50 °C          |
|                       |                      | D2-2474R  | CCACTGCCACATTTTCAGTTC     |           |                |
|                       | 2°PCR and Sequencing | D2-1577Fx | TAGACCTGCCRTTACCATG       | 888       | 55 °C          |
|                       |                      | D2-2465R  | CATTTTCAGTTCTTTTCTTCCAGC  |           |                |

**Table S2.** Sequences analyzed in the present study.

| Analysis | Serotype | Genotype | Accession number | Country         | Collection year |
|----------|----------|----------|------------------|-----------------|-----------------|
| DENV-1   | 1        | I        | AB074760         | Japan           | 1943            |
|          | 1        | II       | AF180817         | Thailand        | 1964            |
|          | 1        | I        | AF350498         | China           | 1980            |
|          | 1        | IV       | AF425611.1       | Australia       | 1983            |
|          | 1        | IV       | AF425627.1       | Philippines     | 1974            |
|          | 1        | V        | AY732476         | Thailand        | 1980            |
|          | 1        | I        | AY732481         | Thailand        | 1982            |
|          | 1        | I        | AY732483         | Thailand        | 1981            |
|          | 1        | IV       | D00502.1         | Thailand        | 1980            |
|          | 1        | III      | EF457905         | Malaysia        | 1972            |
|          | 1        | I        | EU848545.1       | Hawaii          | 1944            |
|          | 1        | I        | JN415487.1       | Vietnam         | 2010            |
|          | 1        | V        | JQ922544.1       | India           | 1963            |
|          | 1        | II       | JQ922547.1       | Thailand        | 1960            |
|          | 1        | I        | JX093667.1       | Vietnam         | 2011            |
|          | 1        | I        | JX093678.1       | Vietnam         | 2011            |
|          | 1        | I        | JX093680.1       | Vietnam         | 2011            |
|          | 1        | I        | JX093687.1       | Vietnam         | 2011            |
|          | 1        | I        | JX093690.1       | Vietnam         | 2011            |
|          | 1        | I        | JX093710.1       | Vietnam         | 2011            |
|          | 1        | I        | KC316022.1       | NewCaledonia    | 2012            |
|          | 1        | I        | KC741439.1       | NewCaledonia    | 2012            |
|          | 1        | I        | KC741442.1       | NewCaledonia    | 2012            |
|          | 1        | I        | KJ806952.1       | Singapore       | 2013            |
|          | 1        | I        | KT825033.1       | Vietnam         | 2014            |
|          | 1        | I        | KU570095.1       | China           | 2012            |
|          | 1        | I        | KY818248.1       | Vietnam         | 2012            |
|          | 1        | I        | KY818250.1       | Vietnam         | 2012            |
|          | 1        | I        | KY971714.1       | Vietnam         | 2012            |
|          | 1        | I        | KY971719.1       | Vietnam         | 2015            |
|          | 1        | I        | LC428061.1       | Vietnam         | 2017            |
|          | 1        | I        | LC428063.1       | Vietnam         | 2017            |
|          | 1        | I        | LC428064.1       | Vietnam         | 2017            |
|          | 1        | I        | LC428065.1       | Vietnam         | 2017            |
|          | 1        | I        | LC428067.1       | Vietnam         | 2017            |
|          | 1        | I        | LC428072.1       | Vietnam         | 2017            |
|          | 1        | I        | LC428075.1       | Vietnam         | 2017            |
|          | 1        | I        | LC428076.1       | Vietnam         | 2017            |
|          | 1        | I        | LC428077.1       | Vietnam         | 2017            |
|          | 1        | I        | MF033254.1       | Singapore       | 2016            |
|          | 1        | I        | MG738066.1       | China           | 2017            |
|          | 1        | I        | MG840558.1       | Vietnam         | 2015            |
|          | 1        | I        | MG894700.1       | Vietnam         | 2012            |
|          | 1        | I        | MG894867.1       | Cambodia        | 2015            |
|          | 1        | I        | MG894885.1       | Vietnam         | 2015            |
|          | 1        | I        | MG894893.1       | Vietnam         | 2015            |
|          | 1        | I        | MG894918.1       | Vietnam         | 2016            |
|          | 1        | I        | MG894943.1       | Vietnam         | 2016            |
|          | 1        | I        | MG894963.1       | Vietnam         | 2016            |
|          | 1        | I        | MG894965.1       | Vietnam         | 2016            |
|          | 1        | I        | MG894966.1       | Vietnam         | 2016            |
|          | 1        | I        | MH807161.1       | FrenchPolynesia | 2015            |
|          | 1        | I        | MN628211.1       | Laos            | 2015            |
|          | 1        | I        | MN628212.1       | Laos            | 2015            |
|          | 1        | I        | MN628218.1       | Laos            | 2015            |
|          | 1        | I        | MN628230.1       | Laos            | 2015            |
|          | 1        | I        | MN912109.1       | Vietnam         | 2017            |
|          | 1        | I        | MN912110.1       | Vietnam         | 2017            |
|          | 1        | I        | MN912111.1       | Vietnam         | 2017            |
|          | 1        | I        | MN912112.1       | Vietnam         | 2017            |
|          | 1        | I        | MN912115.1       | Vietnam         | 2017            |
|          | 1        | I        | MN912117.1       | Vietnam         | 2017            |
|          | 1        | I        | MN912119.1       | Vietnam         | 2017            |
|          | 1        | I        | MN912130.1       | Vietnam         | 2017            |
|          | 1        | I        | MN912224.1       | Vietnam         | 2017            |
|          | 1        | I        | MN912225.1       | Vietnam         | 2017            |
|          | 1        | I        | MN912231.1       | Vietnam         | 2017            |
|          | 1        | I        | MN912233.1       | Vietnam         | 2017            |
|          | 1        | I        | MN912236.1       | Vietnam         | 2017            |
|          | 1        | I        | MN912240.1       | Vietnam         | 2017            |
|          | 1        | I        | MN912242.1       | Vietnam         | 2017            |
|          | 1        | I        | MN912244.1       | Vietnam         | 2017            |
|          | 1        | I        | MN912246.1       | Vietnam         | 2017            |
|          | 1        | I        | MN912247.1       | Vietnam         | 2017            |
|          | 1        | I        | MN912248.1       | Vietnam         | 2017            |
|          | 1        | I        | MN921292.1       | China           | 2019            |
|          | 1        | I        | MT856286.1       | China           | 2017            |
|          | 1        | I        | MW265687.1       | NewCaledonia    | 2012            |
|          | 1        | I        | MW265698.1       | NewCaledonia    | 2013            |
|          | 1        | I        | MW559393.1       | Laos            | 2015            |
|          | 1        | I        | MZ520699.1       | Vietnam         | 2018            |
|          | 1        | I        | MZ618896.1       | NewCaledonia    | 2014            |
|          | 1        | I        | MZ618987.1       | Thailand        | 2019            |
|          | 1        | I        | ON845601.1       | Vietnam         | 2021            |
|          | 1        | I        | ON911789.1       | Vietnam         | 2019            |
|          | 1        | I        | OP090342.1       | Vietnam         | 2022            |
|          | 1        | I        | OP090343.1       | Vietnam         | 2022            |
|          | 1        | I        | OP090344.1       | Vietnam         | 2020            |
|          | 1        | I        | OP090351.1       | Vietnam         | 2020            |

| Analysis      | Serotype | Genotype       | Accession number | Country     | Collection year |             |
|---------------|----------|----------------|------------------|-------------|-----------------|-------------|
|               | 1        | I              | OQ832560         | Vietnam     | 2019            | DENVN19_075 |
|               | 1        | I              | OQ832561         | Vietnam     | 2019            | DENVN19_080 |
|               | 1        | I              | OQ832562         | Vietnam     | 2019            | DENVN19_137 |
|               | 1        | I              | OQ832563         | Vietnam     | 2020            | DENVN20_020 |
|               | 1        | I              | OQ832564         | Vietnam     | 2020            | DENVN20_032 |
|               | 1        | I              | OQ832565         | Vietnam     | 2020            | DENVN20_059 |
|               | 1        | I              | OQ832566         | Vietnam     | 2020            | DENVN20_066 |
|               | 1        | I              | OQ832567         | Vietnam     | 2020            | DENVN20_111 |
|               | 1        | I              | OQ832568         | Vietnam     | 2020            | DENVN20_112 |
|               | 1        | I              | OQ832569         | Vietnam     | 2020            | DENVN20_120 |
|               | 1        | I              | OQ832570         | Vietnam     | 2020            | DENVN20_124 |
|               | 1        | I              | OQ832571         | Vietnam     | 2020            | DENVN20_226 |
| <b>DENV-2</b> |          |                |                  |             |                 |             |
|               | 2        | Asian-II       | AF038403         | NewGuinea   | 1944            |             |
|               | 2        | Cosmopolitan   | AF231716         | Malaysia    | 1969            |             |
|               | 2        | Asian-American | AY484607.3       | PuertoRico  | 1988            |             |
|               | 2        | Cosmopolitan   | DQ518636         | Malaysia    | 2004            |             |
|               | 2        | Asian-American | DQ518639         | Vietnam     | 2005            |             |
|               | 2        | Asian-I        | DQ518648         | Vietnam     | 2005            |             |
|               | 2        | Cosmopolitan   | EU056810         | BurkinaFaso | 1983            |             |
|               | 2        | Cosmopolitan   | EU448428         | Vietnam     | 2007            |             |
|               | 2        | Asian-I        | EU482472         | Vietnam     | 2004            |             |
|               | 2        | Cosmopolitan   | EU482640         | Vietnam     | 2006            |             |
|               | 2        | Asian-I        | EU482657         | Vietnam     | 2006            |             |
|               | 2        | Cosmopolitan   | EU482672         | Vietnam     | 2006            |             |
|               | 2        | Asian-I        | EU482784         | Vietnam     | 2003            |             |
|               | 2        | Asian-I        | EU482786         | Vietnam     | 2003            |             |
|               | 2        | Asian-I        | FJ410221         | Vietnam     | 2007            |             |
|               | 2        | Cosmopolitan   | FJ538920         | India       | 1974            |             |
|               | 2        | Asian-American | FJ639697         | Cambodia    | 2001            |             |
|               | 2        | Asian-American | FJ639698         | Cambodia    | 2002            |             |
|               | 2        | Asian-American | FJ639703         | Cambodia    | 2003            |             |
|               | 2        | Asian-American | FM210202         | Vietnam     | 2004            |             |
|               | 2        | Asian-I        | FM210207         | Vietnam     | 2005            |             |
|               | 2        | Asian-American | FM210213         | Vietnam     | 2005            |             |
|               | 2        | Asian-American | FM210217         | Vietnam     | 1999            |             |
|               | 2        | Asian-American | FM210218         | Vietnam     | 2002            |             |
|               | 2        | Asian-I        | FM210240         | Vietnam     | 2004            |             |
|               | 2        | Cosmopolitan   | GQ398258         | Indonesia   | 1975            |             |
|               | 2        | Cosmopolitan   | GQ398261         | Indonesia   | 1976            |             |
|               | 2        | Cosmopolitan   | GQ398263         | Indonesia   | 1975            |             |
|               | 2        | Asian-II       | GQ398268         | Indonesia   | 1975            |             |
|               | 2        | American       | GQ868592         | Colombia    | 1986            |             |
|               | 2        | Asian-I        | GU211738         | Vietnam     | 2004            |             |
|               | 2        | Asian-American | GU211743         | Vietnam     | 2003            |             |
|               | 2        | Asian-American | GU211751         | Vietnam     | 2006            |             |
|               | 2        | Asian-American | GU211762         | Vietnam     | 2006            |             |
|               | 2        | Asian-American | GU434154         | Vietnam     | 2001            |             |
|               | 2        | Asian-American | GU434156         | Vietnam     | 2003            |             |
|               | 2        | Asian-I        | GU434158         | Vietnam     | 2004            |             |
|               | 2        | Asian-American | GU434159         | Vietnam     | 2004            |             |
|               | 2        | Cosmopolitan   | GU908496         | Vietnam     | 2009            |             |
|               | 2        | Asian-I        | GU908498         | Vietnam     | 2009            |             |
|               | 2        | Asian-I        | HQ588132         | Vietnam     | 2007            |             |
|               | 2        | Asian-I        | HQ588140         | Vietnam     | 2006            |             |
|               | 2        | Asian-I        | JN376791         | Vietnam     | 2008            |             |
|               | 2        | Asian-American | JN819418         | Vietnam     | 1988            |             |
|               | 2        | Cosmopolitan   | JN851113         | Singapore   | 2006            |             |
|               | 2        | Asian-I        | JX093591         | Vietnam     | 2011            |             |
|               | 2        | Cosmopolitan   | JX093594         | Vietnam     | 2011            |             |
|               | 2        | Cosmopolitan   | JX093609         | Vietnam     | 2011            |             |
|               | 2        | Asian-I        | JX093638         | Vietnam     | 2011            |             |
|               | 2        | Asian-I        | JX093643         | Vietnam     | 2011            |             |
|               | 2        | Asian-American | JX649147         | Vietnam     | 1995            |             |
|               | 2        | Asian-American | KF955363         | PuertoRico  | 1986            |             |
|               | 2        | Cosmopolitan   | KJ806910         | Malaysia    | 2013            |             |
|               | 2        | Asian-I        | KP671756         | Vietnam     | 2012            |             |
|               | 2        | Asian-I        | KP769810         | Vietnam     | 2012            |             |
|               | 2        | Asian-I        | KT175128         | Vietnam     | 2012            |             |
|               | 2        | Cosmopolitan   | KT175129         | Vietnam     | 2014            |             |
|               | 2        | Cosmopolitan   | KT781567         | Vietnam     | 2014            |             |
|               | 2        | Cosmopolitan   | KT781568         | Indonesia   | 2015            |             |
|               | 2        | Cosmopolitan   | KX270815         | China       | 2010            |             |
|               | 2        | Asian-I        | KY495819         | Cambodia    | 2015            |             |
|               | 2        | Cosmopolitan   | KY627762         | BurkinaFaso | 2016            |             |
|               | 2        | Cosmopolitan   | KY709187         | Indonesia   | 2015            |             |
|               | 2        | Cosmopolitan   | KY851389         | Indonesia   | 2012            |             |
|               | 2        | Asian-I        | KY851493         | Vietnam     | 2012            |             |
|               | 2        | Cosmopolitan   | KY971720         | Vietnam     | 2015            |             |
|               | 2        | Cosmopolitan   | KY971721         | Vietnam     | 2015            |             |
|               | 2        | Cosmopolitan   | KY971722         | Vietnam     | 2015            |             |
|               | 2        | Cosmopolitan   | KY971723         | Vietnam     | 2015            |             |
|               | 2        | Cosmopolitan   | KY971724         | Vietnam     | 2015            |             |
|               | 2        | Cosmopolitan   | KY971725         | Vietnam     | 2015            |             |
|               | 2        | Cosmopolitan   | KY971726         | Vietnam     | 2015            |             |
|               | 2        | Cosmopolitan   | KY971727         | Vietnam     | 2015            |             |
|               | 2        | Cosmopolitan   | KY971728         | Vietnam     | 2015            |             |
|               | 2        | Cosmopolitan   | KY971729         | Vietnam     | 2015            |             |
|               | 2        | Cosmopolitan   | KY971730         | Vietnam     | 2015            |             |
|               | 2        | Cosmopolitan   | KY971731         | Vietnam     | 2015            |             |
|               | 2        | Cosmopolitan   | KY971732         | Vietnam     | 2015            |             |
|               | 2        | Cosmopolitan   | KY971733         | Vietnam     | 2015            |             |
|               | 2        | Cosmopolitan   | KY971734         | Vietnam     | 2015            |             |
|               | 2        | Cosmopolitan   | KY971735         | Vietnam     | 2015            |             |

| Analysis | Serotype | Genotype     | Accession number | Country        | Collection year |
|----------|----------|--------------|------------------|----------------|-----------------|
|          | 2        | Cosmopolitan | KY971736         | Vietnam        | 2015            |
|          | 2        | Cosmopolitan | KY971737         | Vietnam        | 2015            |
|          | 2        | Cosmopolitan | KY971738         | Vietnam        | 2015            |
|          | 2        | Cosmopolitan | KY971739         | Vietnam        | 2015            |
|          | 2        | Cosmopolitan | KY971740         | Vietnam        | 2015            |
|          | 2        | Cosmopolitan | KY971741         | Vietnam        | 2015            |
|          | 2        | Cosmopolitan | LC410190         | Thailand       | 2016            |
|          | 2        | Cosmopolitan | LC410191         | Thailand       | 2017            |
|          | 2        | Asian-I      | LC553001         | Japan          | 2019            |
|          | 2        | Cosmopolitan | MF156237         | China          | 2015            |
|          | 2        | Cosmopolitan | MF940248         | China          | 2015            |
|          | 2        | Asian-I      | MG737984         | Vietnam_China  | 2015            |
|          | 2        | Asian-I      | MG894978         | Vietnam        | 2011            |
|          | 2        | Asian-I      | MG894980         | Vietnam        | 2011            |
|          | 2        | Asian-I      | MG894983         | Vietnam        | 2011            |
|          | 2        | Cosmopolitan | MG894991         | Vietnam        | 2011            |
|          | 2        | Asian-I      | MG895013         | Vietnam        | 2012            |
|          | 2        | Asian-I      | MG895014         | Vietnam        | 2012            |
|          | 2        | Asian-I      | MG895017         | Vietnam        | 2013            |
|          | 2        | Asian-I      | MG895033         | Vietnam        | 2013            |
|          | 2        | Cosmopolitan | MG895039         | Vietnam        | 2013            |
|          | 2        | Cosmopolitan | MG895076         | Malaysia       | 2015            |
|          | 2        | Asian-I      | MG895101         | Vietnam        | 2015            |
|          | 2        | Asian-I      | MG895102         | Vietnam        | 2015            |
|          | 2        | Asian-I      | MG895109         | Vietnam        | 2015            |
|          | 2        | Cosmopolitan | MG895118         | Vietnam        | 2015            |
|          | 2        | Cosmopolitan | MG895119         | Vietnam        | 2015            |
|          | 2        | Cosmopolitan | MG895120         | Vietnam        | 2015            |
|          | 2        | Cosmopolitan | MG895121         | Vietnam        | 2015            |
|          | 2        | Asian-I      | MG895129         | Vietnam        | 2015            |
|          | 2        | Asian-I      | MG895130         | Vietnam        | 2015            |
|          | 2        | Cosmopolitan | MG895150         | Thailand       | 2016            |
|          | 2        | Asian-I      | MG895161         | Laos           | 2016            |
|          | 2        | Asian-I      | MG895167         | Vietnam        | 2016            |
|          | 2        | Asian-I      | MH010611         | China          | 2017            |
|          | 2        | Cosmopolitan | MH173164         | Indonesia      | 2016            |
|          | 2        | Cosmopolitan | MH822942         | India          | 2014            |
|          | 2        | Cosmopolitan | MH827525         | China          | 2014            |
|          | 2        | Cosmopolitan | MK564479         | China          | 2016            |
|          | 2        | Cosmopolitan | MK578531         | China          | 2016            |
|          | 2        | Cosmopolitan | MK783199         | China          | 2018            |
|          | 2        | Cosmopolitan | MK858111         | India          | 2016            |
|          | 2        | Cosmopolitan | MN444605         | Laos           | 2015            |
|          | 2        | Cosmopolitan | MN444606         | Laos           | 2016            |
|          | 2        | Cosmopolitan | MN444609         | Laos           | 2017            |
|          | 2        | Asian-I      | MN444611         | Laos           | 2017            |
|          | 2        | Cosmopolitan | MN444614         | Laos           | 2018            |
|          | 2        | Cosmopolitan | MN444618         | Laos           | 2017            |
|          | 2        | Asian-I      | MN923114         | Cambodia_China | 2019            |
|          | 2        | Cosmopolitan | MN923116         | China          | 2019            |
|          | 2        | Cosmopolitan | MN952967         | China          | 2015            |
|          | 2        | Cosmopolitan | MN955677         | Thailand       | 2018            |
|          | 2        | Cosmopolitan | MN982889         | Indonesia      | 2019            |
|          | 2        | Cosmopolitan | MN982899         | Australia      | 2019            |
|          | 2        | Cosmopolitan | MT856323         | China          | 2019            |
|          | 2        | Asian-I      | MT856336         | China          | 2019            |
|          | 2        | Cosmopolitan | MT982917         | Mali           | 2017            |
|          | 2        | Cosmopolitan | MW288029         | Senegal        | 2018            |
|          | 2        | Cosmopolitan | MW512413         | Singapore      | 2014            |
|          | 2        | Cosmopolitan | MW512448         | Singapore      | 2015            |
|          | 2        | Cosmopolitan | MW512451         | Singapore      | 2016            |
|          | 2        | Cosmopolitan | MW512466         | Singapore      | 2016            |
|          | 2        | Cosmopolitan | MW512468         | Singapore      | 2017            |
|          | 2        | Cosmopolitan | MW512469         | Singapore      | 2017            |
|          | 2        | Cosmopolitan | MW945435         | Vietnam        | 2006            |
|          | 2        | Cosmopolitan | MW946478         | India          | 1974            |
|          | 2        | Cosmopolitan | MZ277506         | India          | 2019            |
|          | 2        | Cosmopolitan | MZ277514         | India          | 2018            |
|          | 2        | Asian-I      | MZ636761         | Thailand       | 2018            |
|          | 2        | Cosmopolitan | MZ636781         | Thailand       | 2019            |
|          | 2        | Cosmopolitan | MZ636804         | Thailand       | 2019            |
|          | 2        | Asian-I      | NC_001474        | Thailand       | 1964            |
|          | 2        | Cosmopolitan | OK180527         | Indonesia      | 2016            |
|          | 2        | Cosmopolitan | OL412740         | Cambodia       | 2019            |
|          | 2        | Asian-I      | OL414743         | Cambodia       | 2019            |
|          | 2        | Cosmopolitan | OL414746         | Cambodia       | 2020            |
|          | 2        | Asian-I      | OL414761         | Cambodia       | 2019            |
|          | 2        | Cosmopolitan | OM317566         | Cameroon       | 2020            |
|          | 2        | Cosmopolitan | OP090388         | Vietnam        | 2022            |
|          | 2        | Cosmopolitan | OP090389         | Vietnam        | 2022            |
|          | 2        | Cosmopolitan | OP090390         | Vietnam        | 2022            |
|          | 2        | Cosmopolitan | OP090391         | Vietnam        | 2022            |
|          | 2        | Cosmopolitan | OP090392         | Vietnam        | 2022            |
|          | 2        | Cosmopolitan | OP090393         | Vietnam        | 2022            |
|          | 2        | Asian-I      | OP090394         | Vietnam        | 2022            |
|          | 2        | Asian-I      | OP090395         | Vietnam        | 2021            |
|          | 2        | Asian-I      | OP090396         | Vietnam        | 2022            |
|          | 2        | Asian-I      | OP090397         | Vietnam        | 2020            |
|          | 2        | Cosmopolitan | OP410989         | Singapore      | 2007            |
|          | 2        | Cosmopolitan | OP458511         | Vietnam        | 2019            |
|          | 2        | Cosmopolitan | OP458512         | Vietnam        | 2020            |
|          | 2        | Asian-I      | OP458513         | Vietnam        | 2019            |
|          | 2        | Cosmopolitan | OP458514         | Vietnam        | 2020            |
|          | 2        | Cosmopolitan | OP458515         | Vietnam        | 2021            |

| Analysis            | Serotype | Genotype     | Accession number | Country     | Collection year |             |
|---------------------|----------|--------------|------------------|-------------|-----------------|-------------|
|                     | 2        | Cosmopolitan | OP458516         | Vietnam     | 2020            |             |
|                     | 2        | Cosmopolitan | OP458517         | Vietnam     | 2019            |             |
|                     | 2        | Cosmopolitan | OP684209         | China       | 2019            |             |
|                     | 2        | Cosmopolitan | OP895918         | Cambodia    | 2019            |             |
|                     | 2        | Cosmopolitan | OP984834         | Vietnam     | 2022            |             |
|                     | 2        | Asian-I      | QQ028205         | Vietnam     | 2017            |             |
|                     | 2        | Cosmopolitan | QQ028206         | Vietnam     | 2018            |             |
|                     | 2        | Cosmopolitan | QQ028207         | Vietnam     | 2019            |             |
|                     | 2        | Cosmopolitan | QQ028208         | Vietnam     | 2019            |             |
|                     | 2        | Cosmopolitan | QQ028209         | Vietnam     | 2020            |             |
|                     | 2        | Cosmopolitan | QQ028210         | Vietnam     | 2020            |             |
|                     | 2        | Cosmopolitan | QQ028211         | Vietnam     | 2020            |             |
|                     | 2        | Cosmopolitan | QQ028212         | Vietnam     | 2020            |             |
|                     | 2        | Cosmopolitan | QQ028213         | Vietnam     | 2019            |             |
|                     | 2        | Cosmopolitan | QQ028214         | Vietnam     | 2019            |             |
|                     | 2        | Asian-I      | QQ028215         | Vietnam     | 2019            |             |
|                     | 2        | Cosmopolitan | QQ028216         | Vietnam     | 2022            |             |
|                     | 2        | Cosmopolitan | QQ028217         | Vietnam     | 2019            |             |
|                     | 2        | Asian-I      | QQ028218         | Vietnam     | 2019            |             |
|                     | 2        | Asian-I      | QQ028219         | Vietnam     | 2020            |             |
|                     | 2        | Cosmopolitan | QQ028220         | Vietnam     | 2019            |             |
|                     | 2        | Asian-I      | QQ028221         | Vietnam     | 2019            |             |
|                     | 2        | Asian-I      | QQ028222         | Vietnam     | 2019            |             |
|                     | 2        | Asian-I      | QQ028223         | Vietnam     | 2019            |             |
|                     | 2        | Asian-I      | QQ028224         | Vietnam     | 2019            |             |
|                     | 2        | Cosmopolitan | QQ028225         | Vietnam     | 2020            |             |
|                     | 2        | Asian-I      | QQ028226         | Vietnam     | 2019            |             |
|                     | 2        | Cosmopolitan | QQ028227         | Vietnam     | 2019            |             |
|                     | 2        | Asian-I      | QQ028228         | Vietnam     | 2019            |             |
|                     | 2        | Asian-I      | QQ028229         | Vietnam     | 2017            |             |
|                     | 2        | Cosmopolitan | QQ028230         | Vietnam     | 2020            |             |
|                     | 2        | Asian-I      | QQ028231         | Vietnam     | 2018            |             |
|                     | 2        | Cosmopolitan | QQ028232         | Vietnam     | 2020            |             |
|                     | 2        | Cosmopolitan | QQ426757         | Vietnam     | 2018            |             |
|                     | 2        | Cosmopolitan | QQ426766         | Vietnam     | 2019            |             |
|                     | 2        | Cosmopolitan | QQ426773         | Vietnam     | 2018            |             |
|                     | 2        | Cosmopolitan | QQ426782         | Vietnam     | 2018            |             |
|                     | 2        | Asian-I      | QQ426797         | Vietnam     | 2018            |             |
|                     | 2        | Asian-I      | QQ426819         | Vietnam     | 2018            |             |
|                     | 2        | Asian-I      | QQ426843         | Vietnam     | 2018            |             |
|                     | 2        | Cosmopolitan | QQ426847         | Vietnam     | 2018            |             |
|                     | 2        | Asian-I      | QQ426879         | Vietnam     | 2019            |             |
|                     | 2        | Asian-I      | QQ426905         | Vietnam     | 2019            |             |
|                     | 2        | Asian-I      | QQ426907         | Vietnam     | 2017            |             |
|                     | 2        | Asian-I      | QQ426912         | Vietnam     | 2018            |             |
|                     | 2        | Cosmopolitan | QQ426916         | Vietnam     | 2018            |             |
|                     | 2        | Cosmopolitan | QQ426918         | Vietnam     | 2018            |             |
|                     | 2        | Asian-I      | QQ426919         | Vietnam     | 2018            |             |
|                     | 2        | Asian-I      | QQ426956         | Vietnam     | 2018            |             |
|                     | 2        | Cosmopolitan | QQ832572         | Vietnam     | 2019            | DENVN19_004 |
|                     | 2        | Cosmopolitan | QQ832573         | Vietnam     | 2019            | DENVN19_006 |
|                     | 2        | Asian-I      | QQ832574         | Vietnam     | 2019            | DENVN19_010 |
|                     | 2        | Cosmopolitan | QQ832575         | Vietnam     | 2019            | DENVN19_011 |
|                     | 2        | Cosmopolitan | QQ832576         | Vietnam     | 2019            | DENVN19_013 |
|                     | 2        | Cosmopolitan | QQ832577         | Vietnam     | 2019            | DENVN19_015 |
|                     | 2        | Cosmopolitan | QQ832578         | Vietnam     | 2019            | DENVN19_078 |
|                     | 2        | Cosmopolitan | QQ832579         | Vietnam     | 2019            | DENVN19_089 |
|                     | 2        | Asian-I      | QQ832580         | Vietnam     | 2019            | DENVN19_140 |
|                     | 2        | Cosmopolitan | QQ832581         | Vietnam     | 2019            | DENVN19_142 |
|                     | 2        | Asian-I      | QQ832582         | Vietnam     | 2019            | DENVN19_143 |
|                     | 2        | Cosmopolitan | QQ832583         | Vietnam     | 2019            | DENVN19_144 |
|                     | 2        | Cosmopolitan | QQ832584         | Vietnam     | 2020            | DENVN20_019 |
|                     | 2        | Cosmopolitan | QQ832585         | Vietnam     | 2020            | DENVN20_021 |
|                     | 2        | Cosmopolitan | QQ832586         | Vietnam     | 2020            | DENVN20_049 |
|                     | 2        | Cosmopolitan | QQ832587         | Vietnam     | 2020            | DENVN20_074 |
|                     | 2        | Cosmopolitan | QQ832588         | Vietnam     | 2020            | DENVN20_106 |
|                     | 2        | Cosmopolitan | QQ832589         | Vietnam     | 2020            | DENVN20_107 |
|                     | 2        | Cosmopolitan | QQ832590         | Vietnam     | 2020            | DENVN20_113 |
|                     | 2        | Asian-I      | QQ832591         | Vietnam     | 2020            | DENVN20_118 |
|                     | 2        | Asian-I      | QQ832592         | Vietnam     | 2020            | DENVN20_127 |
|                     | 2        | Cosmopolitan | QQ832593         | Vietnam     | 2020            | DENVN20_210 |
|                     | 2        | Cosmopolitan | QQ832594         | Vietnam     | 2020            | DENVN20_220 |
| DENV-2 Cosmopolitan |          |              |                  |             |                 |             |
|                     | 2        | Cosmopolitan | AF231716         | Malaysia    | 1969            |             |
|                     | 2        | Cosmopolitan | AY858035         | Indonesia   | 2004            |             |
|                     | 2        | Cosmopolitan | DQ518636         | Malaysia    | 2004            |             |
|                     | 2        | Cosmopolitan | EU056810         | BurkinaFaso | 1983            |             |
|                     | 2        | Cosmopolitan | EU448428         | Vietnam     | 2007            |             |
|                     | 2        | Cosmopolitan | EU482640         | Vietnam     | 2006            |             |
|                     | 2        | Cosmopolitan | EU482672         | Vietnam     | 2006            |             |
|                     | 2        | Cosmopolitan | FJ538920         | India       | 1974            |             |
|                     | 2        | Cosmopolitan | GQ398258         | Indonesia   | 1975            |             |
|                     | 2        | Cosmopolitan | GQ398261         | Indonesia   | 1976            |             |
|                     | 2        | Cosmopolitan | GQ398263         | Indonesia   | 1975            |             |
|                     | 2        | Cosmopolitan | GQ398264         | Indonesia   | 1976            |             |
|                     | 2        | Cosmopolitan | GU908496         | Vietnam     | 2009            |             |
|                     | 2        | Cosmopolitan | JF327392         | Singapore   | 2009            |             |
|                     | 2        | Cosmopolitan | JF968007         | Indonesia   | 2010            |             |
|                     | 2        | Cosmopolitan | JN851113         | Singapore   | 2006            |             |
|                     | 2        | Cosmopolitan | JX093609         | Vietnam     | 2011            |             |
|                     | 2        | Cosmopolitan | KC131142         | China       | 2012            |             |
|                     | 2        | Cosmopolitan | KC762667         | Indonesia   | 2008            |             |
|                     | 2        | Cosmopolitan | KC762671         | Indonesia   | 2008            |             |
|                     | 2        | Cosmopolitan | KF744397         | Philippines | 2001            |             |

| Analysis | Serotype | Genotype     | Accession number | Country      | Collection year |
|----------|----------|--------------|------------------|--------------|-----------------|
|          | 2        | Cosmopolitan | KJ806811         | Singapore    | 2014            |
|          | 2        | Cosmopolitan | KJ806891         | Malaysia     | 2013            |
|          | 2        | Cosmopolitan | KJ806910         | Malaysia     | 2013            |
|          | 2        | Cosmopolitan | KT175129         | Vietnam      | 2014            |
|          | 2        | Cosmopolitan | KT781567         | Vietnam      | 2014            |
|          | 2        | Cosmopolitan | KU517846         | Indonesia    | 2014            |
|          | 2        | Cosmopolitan | KX270815         | China        | 2010            |
|          | 2        | Cosmopolitan | KX372564         | Australia    | 2015            |
|          | 2        | Cosmopolitan | KX380815         | Singapore    | 2012            |
|          | 2        | Cosmopolitan | KX452030         | Malaysia     | 2014            |
|          | 2        | Cosmopolitan | KX452042         | Malaysia     | 2014            |
|          | 2        | Cosmopolitan | KX577683         | China        | 2015            |
|          | 2        | Cosmopolitan | KY627762         | BurkinaFaso  | 2016            |
|          | 2        | Cosmopolitan | KY709187         | Indonesia    | 2015            |
|          | 2        | Cosmopolitan | KY851436         | Philippines  | 2013            |
|          | 2        | Cosmopolitan | KY971720         | Vietnam      | 2015            |
|          | 2        | Cosmopolitan | KY971721         | Vietnam      | 2015            |
|          | 2        | Cosmopolitan | KY971722         | Vietnam      | 2015            |
|          | 2        | Cosmopolitan | KY971723         | Vietnam      | 2015            |
|          | 2        | Cosmopolitan | KY971724         | Vietnam      | 2015            |
|          | 2        | Cosmopolitan | KY971725         | Vietnam      | 2015            |
|          | 2        | Cosmopolitan | KY971726         | Vietnam      | 2015            |
|          | 2        | Cosmopolitan | KY971727         | Vietnam      | 2015            |
|          | 2        | Cosmopolitan | KY971728         | Vietnam      | 2015            |
|          | 2        | Cosmopolitan | KY971729         | Vietnam      | 2015            |
|          | 2        | Cosmopolitan | KY971730         | Vietnam      | 2015            |
|          | 2        | Cosmopolitan | KY971731         | Vietnam      | 2015            |
|          | 2        | Cosmopolitan | KY971732         | Vietnam      | 2015            |
|          | 2        | Cosmopolitan | KY971733         | Vietnam      | 2015            |
|          | 2        | Cosmopolitan | KY971734         | Vietnam      | 2015            |
|          | 2        | Cosmopolitan | KY971735         | Vietnam      | 2015            |
|          | 2        | Cosmopolitan | KY971736         | Vietnam      | 2015            |
|          | 2        | Cosmopolitan | KY971737         | Vietnam      | 2015            |
|          | 2        | Cosmopolitan | KY971738         | Vietnam      | 2015            |
|          | 2        | Cosmopolitan | KY971739         | Vietnam      | 2015            |
|          | 2        | Cosmopolitan | KY971740         | Vietnam      | 2015            |
|          | 2        | Cosmopolitan | KY971741         | Vietnam      | 2015            |
|          | 2        | Cosmopolitan | LC410190         | Thailand     | 2016            |
|          | 2        | Cosmopolitan | LC410191         | Thailand     | 2017            |
|          | 2        | Cosmopolitan | LC436669         | Bangladesh   | 2017            |
|          | 2        | Cosmopolitan | LC436673         | Bangladesh   | 2017            |
|          | 2        | Cosmopolitan | LC436674         | Bangladesh   | 2017            |
|          | 2        | Cosmopolitan | MF940248         | China        | 2015            |
|          | 2        | Cosmopolitan | MG840586         | China        | 2016            |
|          | 2        | Cosmopolitan | MG840629         | China        | 2017            |
|          | 2        | Cosmopolitan | MG894991         | Vietnam      | 2011            |
|          | 2        | Cosmopolitan | MG895039         | Vietnam      | 2013            |
|          | 2        | Cosmopolitan | MG895076         | Malaysia     | 2015            |
|          | 2        | Cosmopolitan | MG895118         | Vietnam      | 2015            |
|          | 2        | Cosmopolitan | MG895119         | Vietnam      | 2015            |
|          | 2        | Cosmopolitan | MG895120         | Vietnam      | 2015            |
|          | 2        | Cosmopolitan | MG895121         | Vietnam      | 2015            |
|          | 2        | Cosmopolitan | MG895150         | Thailand     | 2016            |
|          | 2        | Cosmopolitan | MH048672         | Malaysia     | 2014            |
|          | 2        | Cosmopolitan | MH110564         | China        | 2017            |
|          | 2        | Cosmopolitan | MH173164         | Indonesia    | 2016            |
|          | 2        | Cosmopolitan | MH729974         | China        | 2015            |
|          | 2        | Cosmopolitan | MH729981         | China        | 2016            |
|          | 2        | Cosmopolitan | MH822942         | India        | 2014            |
|          | 2        | Cosmopolitan | MH827525         | China        | 2014            |
|          | 2        | Cosmopolitan | MH827548         | Maldives     | 2017            |
|          | 2        | Cosmopolitan | MH827551         | Maldives     | 2017            |
|          | 2        | Cosmopolitan | MK543448         | China        | 2018            |
|          | 2        | Cosmopolitan | MK564479         | China        | 2016            |
|          | 2        | Cosmopolitan | MK564480         | China        | 2016            |
|          | 2        | Cosmopolitan | MK578531         | China        | 2016            |
|          | 2        | Cosmopolitan | MK783199         | China        | 2018            |
|          | 2        | Cosmopolitan | MK783201         | China        | 2018            |
|          | 2        | Cosmopolitan | MK858111         | India        | 2016            |
|          | 2        | Cosmopolitan | MN018343         | China        | 2017            |
|          | 2        | Cosmopolitan | MN018353         | China        | 2016            |
|          | 2        | Cosmopolitan | MN083229         | SriLanka     | 2017            |
|          | 2        | Cosmopolitan | MN444605         | Laos         | 2015            |
|          | 2        | Cosmopolitan | MN444606         | Laos         | 2016            |
|          | 2        | Cosmopolitan | MN444609         | Laos         | 2017            |
|          | 2        | Cosmopolitan | MN444613         | Laos         | 2018            |
|          | 2        | Cosmopolitan | MN444614         | Laos         | 2018            |
|          | 2        | Cosmopolitan | MN444615         | Laos         | 2018            |
|          | 2        | Cosmopolitan | MN444616         | Laos         | 2018            |
|          | 2        | Cosmopolitan | MN444618         | Laos         | 2017            |
|          | 2        | Cosmopolitan | MN444622         | Laos         | 2017            |
|          | 2        | Cosmopolitan | MN548844         | Vanuatu      | 2019            |
|          | 2        | Cosmopolitan | MN548846         | NewCaledonia | 2019            |
|          | 2        | Cosmopolitan | MN548855         | WallisFutuna | 2019            |
|          | 2        | Cosmopolitan | MN577555         | Kenya        | 2017            |
|          | 2        | Cosmopolitan | MN923116         | China        | 2019            |
|          | 2        | Cosmopolitan | MN952967         | China        | 2015            |
|          | 2        | Cosmopolitan | MN955677         | Thailand     | 2018            |
|          | 2        | Cosmopolitan | MN982889         | Indonesia    | 2019            |
|          | 2        | Cosmopolitan | MN982899         | Australia    | 2019            |
|          | 2        | Cosmopolitan | MN982900         | Australia    | 2019            |
|          | 2        | Cosmopolitan | MN982901         | Australia    | 2019            |
|          | 2        | Cosmopolitan | MT006171         | SriLanka     | 2018            |
|          | 2        | Cosmopolitan | MT006175         | SriLanka     | 2018            |

| Analysis | Serotype | Genotype     | Accession number | Country      | Collection year |
|----------|----------|--------------|------------------|--------------|-----------------|
|          | 2        | Cosmopolitan | MT799882         | NewCaledonia | 2020            |
|          | 2        | Cosmopolitan | MT856314         | China        | 2017            |
|          | 2        | Cosmopolitan | MT856323         | China        | 2019            |
|          | 2        | Cosmopolitan | MT921573         | Australia    | 2004            |
|          | 2        | Cosmopolitan | MT982917         | Mali         | 2017            |
|          | 2        | Cosmopolitan | MW288029         | Senegal      | 2018            |
|          | 2        | Cosmopolitan | MW481670         | Angola       | 2019            |
|          | 2        | Cosmopolitan | MW481671         | Angola       | 2018            |
|          | 2        | Cosmopolitan | MW510042         | Singapore    | 2018            |
|          | 2        | Cosmopolitan | MW510249         | Singapore    | 2011            |
|          | 2        | Cosmopolitan | MW512369         | Singapore    | 2011            |
|          | 2        | Cosmopolitan | MW512413         | Singapore    | 2014            |
|          | 2        | Cosmopolitan | MW512418         | Singapore    | 2014            |
|          | 2        | Cosmopolitan | MW512428         | Singapore    | 2014            |
|          | 2        | Cosmopolitan | MW512448         | Singapore    | 2015            |
|          | 2        | Cosmopolitan | MW512451         | Singapore    | 2016            |
|          | 2        | Cosmopolitan | MW512452         | Singapore    | 2016            |
|          | 2        | Cosmopolitan | MW512454         | Singapore    | 2016            |
|          | 2        | Cosmopolitan | MW512462         | Singapore    | 2016            |
|          | 2        | Cosmopolitan | MW512465         | Singapore    | 2016            |
|          | 2        | Cosmopolitan | MW512466         | Singapore    | 2016            |
|          | 2        | Cosmopolitan | MW512468         | Singapore    | 2017            |
|          | 2        | Cosmopolitan | MW512469         | Singapore    | 2017            |
|          | 2        | Cosmopolitan | MW512471         | Singapore    | 2017            |
|          | 2        | Cosmopolitan | MW512473         | Singapore    | 2017            |
|          | 2        | Cosmopolitan | MW512475         | Singapore    | 2017            |
|          | 2        | Cosmopolitan | MW512484         | Singapore    | 2018            |
|          | 2        | Cosmopolitan | MW585365         | NewCaledonia | 2017            |
|          | 2        | Cosmopolitan | MW721471         | China        | 2014            |
|          | 2        | Cosmopolitan | MW730825         | Nepal        | 2017            |
|          | 2        | Cosmopolitan | MW730831         | Nepal        | 2017            |
|          | 2        | Cosmopolitan | MW945435         | Vietnam      | 2006            |
|          | 2        | Cosmopolitan | MW946478         | India        | 1974            |
|          | 2        | Cosmopolitan | MZ277459         | India        | 2018            |
|          | 2        | Cosmopolitan | MZ277506         | India        | 2019            |
|          | 2        | Cosmopolitan | MZ277514         | India        | 2018            |
|          | 2        | Cosmopolitan | MZ277532         | India        | 2018            |
|          | 2        | Cosmopolitan | MZ312931         | India        | 2017            |
|          | 2        | Cosmopolitan | MZ636781         | Thailand     | 2019            |
|          | 2        | Cosmopolitan | MZ636802         | Thailand     | 2019            |
|          | 2        | Cosmopolitan | MZ636804         | Thailand     | 2019            |
|          | 2        | Cosmopolitan | OK180527         | Indonesia    | 2016            |
|          | 2        | Cosmopolitan | OL412740         | Cambodia     | 2019            |
|          | 2        | Cosmopolitan | OL414746         | Cambodia     | 2020            |
|          | 2        | Cosmopolitan | OL960215         | Indonesia    | 2016            |
|          | 2        | Cosmopolitan | OL960221         | Indonesia    | 2015            |
|          | 2        | Cosmopolitan | OM317565         | Cameroon     | 2020            |
|          | 2        | Cosmopolitan | OM639981         | India        | 2021            |
|          | 2        | Cosmopolitan | OM680963         | India        | 2021            |
|          | 2        | Cosmopolitan | OM791800         | Peru         | 2019            |
|          | 2        | Cosmopolitan | OM791801         | Peru         | 2019            |
|          | 2        | Cosmopolitan | ON123631         | Peru         | 2021            |
|          | 2        | Cosmopolitan | ON634745         | Brazil       | 2022            |
|          | 2        | Cosmopolitan | ON634756         | Brazil       | 2022            |
|          | 2        | Cosmopolitan | OP090388         | Vietnam      | 2022            |
|          | 2        | Cosmopolitan | OP090389         | Vietnam      | 2022            |
|          | 2        | Cosmopolitan | OP090390         | Vietnam      | 2022            |
|          | 2        | Cosmopolitan | OP090391         | Vietnam      | 2022            |
|          | 2        | Cosmopolitan | OP090392         | Vietnam      | 2022            |
|          | 2        | Cosmopolitan | OP090393         | Vietnam      | 2022            |
|          | 2        | Cosmopolitan | OP410989         | Singapore    | 2007            |
|          | 2        | Cosmopolitan | OP458511         | Vietnam      | 2019            |
|          | 2        | Cosmopolitan | OP458512         | Vietnam      | 2020            |
|          | 2        | Cosmopolitan | OP458514         | Vietnam      | 2020            |
|          | 2        | Cosmopolitan | OP458515         | Vietnam      | 2021            |
|          | 2        | Cosmopolitan | OP458516         | Vietnam      | 2020            |
|          | 2        | Cosmopolitan | OP458517         | Vietnam      | 2019            |
|          | 2        | Cosmopolitan | OP684209         | China        | 2019            |
|          | 2        | Cosmopolitan | OP684210         | China        | 2019            |
|          | 2        | Cosmopolitan | OP811982         | Pakistan     | 2022            |
|          | 2        | Cosmopolitan | OP895917         | Maldives     | 2021            |
|          | 2        | Cosmopolitan | OP895918         | Cambodia     | 2019            |
|          | 2        | Cosmopolitan | OP984834         | Vietnam      | 2022            |
|          | 2        | Cosmopolitan | QQ028206         | Vietnam      | 2018            |
|          | 2        | Cosmopolitan | QQ028207         | Vietnam      | 2019            |
|          | 2        | Cosmopolitan | QQ028208         | Vietnam      | 2019            |
|          | 2        | Cosmopolitan | QQ028209         | Vietnam      | 2020            |
|          | 2        | Cosmopolitan | QQ028210         | Vietnam      | 2020            |
|          | 2        | Cosmopolitan | QQ028211         | Vietnam      | 2020            |
|          | 2        | Cosmopolitan | QQ028212         | Vietnam      | 2020            |
|          | 2        | Cosmopolitan | QQ028213         | Vietnam      | 2019            |
|          | 2        | Cosmopolitan | QQ028214         | Vietnam      | 2019            |
|          | 2        | Cosmopolitan | QQ028216         | Vietnam      | 2022            |
|          | 2        | Cosmopolitan | QQ028217         | Vietnam      | 2019            |
|          | 2        | Cosmopolitan | QQ028220         | Vietnam      | 2019            |
|          | 2        | Cosmopolitan | QQ028225         | Vietnam      | 2020            |
|          | 2        | Cosmopolitan | QQ028227         | Vietnam      | 2019            |
|          | 2        | Cosmopolitan | QQ028230         | Vietnam      | 2020            |
|          | 2        | Cosmopolitan | QQ028232         | Vietnam      | 2020            |
|          | 2        | Cosmopolitan | QQ426757         | Vietnam      | 2018            |
|          | 2        | Cosmopolitan | QQ426766         | Vietnam      | 2019            |
|          | 2        | Cosmopolitan | QQ426773         | Vietnam      | 2018            |
|          | 2        | Cosmopolitan | QQ426782         | Vietnam      | 2018            |
|          | 2        | Cosmopolitan | QQ426847         | Vietnam      | 2018            |

| Analysis                        | Serotype | Genotype     | Accession number | Country | Collection year |             |
|---------------------------------|----------|--------------|------------------|---------|-----------------|-------------|
|                                 | 2        | Cosmopolitan | QQ426916         | Vietnam | 2018            |             |
|                                 | 2        | Cosmopolitan | QQ426918         | Vietnam | 2018            |             |
|                                 | 2        | Cosmopolitan | QQ832572         | Vietnam | 2019            | DENVN19_004 |
|                                 | 2        | Cosmopolitan | QQ832573         | Vietnam | 2019            | DENVN19_006 |
|                                 | 2        | Cosmopolitan | QQ832575         | Vietnam | 2019            | DENVN19_011 |
|                                 | 2        | Cosmopolitan | QQ832576         | Vietnam | 2019            | DENVN19_013 |
|                                 | 2        | Cosmopolitan | QQ832577         | Vietnam | 2019            | DENVN19_015 |
|                                 | 2        | Cosmopolitan | QQ832578         | Vietnam | 2019            | DENVN19_078 |
|                                 | 2        | Cosmopolitan | QQ832579         | Vietnam | 2019            | DENVN19_089 |
|                                 | 2        | Cosmopolitan | QQ832581         | Vietnam | 2019            | DENVN19_142 |
|                                 | 2        | Cosmopolitan | QQ832583         | Vietnam | 2019            | DENVN19_144 |
|                                 | 2        | Cosmopolitan | QQ832584         | Vietnam | 2020            | DENVN20_019 |
|                                 | 2        | Cosmopolitan | QQ832585         | Vietnam | 2020            | DENVN20_021 |
|                                 | 2        | Cosmopolitan | QQ832586         | Vietnam | 2020            | DENVN20_049 |
|                                 | 2        | Cosmopolitan | QQ832587         | Vietnam | 2020            | DENVN20_074 |
|                                 | 2        | Cosmopolitan | QQ832588         | Vietnam | 2020            | DENVN20_106 |
|                                 | 2        | Cosmopolitan | QQ832589         | Vietnam | 2020            | DENVN20_107 |
|                                 | 2        | Cosmopolitan | QQ832590         | Vietnam | 2020            | DENVN20_113 |
|                                 | 2        | Cosmopolitan | QQ832593         | Vietnam | 2020            | DENVN20_210 |
|                                 | 2        | Cosmopolitan | QQ832594         | Vietnam | 2020            | DENVN20_220 |
| <b>Amino acid polymorphisms</b> |          |              |                  |         |                 |             |
|                                 | 1        | I            | QQ832609         | Vietnam | 2019            | DENVN19_075 |
|                                 | 1        | I            | QQ832610         | Vietnam | 2019            | DENVN19_080 |
|                                 | 1        | I            | QQ832611         | Vietnam | 2019            | DENVN19_129 |
|                                 | 1        | I            | QQ832612         | Vietnam | 2019            | DENVN19_137 |
|                                 | 1        | I            | QQ832613         | Vietnam | 2020            | DENVN20_111 |
|                                 | 1        | I            | QQ832614         | Vietnam | 2020            | DENVN20_112 |
|                                 | 1        | I            | QQ832615         | Vietnam | 2020            | DENVN20_120 |
|                                 | 2        | Cosmopolitan | QQ832616         | Vietnam | 2019            | DENVN19_004 |
|                                 | 2        | Asian-I      | QQ832617         | Vietnam | 2019            | DENVN19_010 |
|                                 | 2        | Cosmopolitan | QQ832618         | Vietnam | 2019            | DENVN19_011 |
|                                 | 2        | Cosmopolitan | QQ832619         | Vietnam | 2019            | DENVN19_013 |
|                                 | 2        | Cosmopolitan | QQ832620         | Vietnam | 2019            | DENVN19_015 |
|                                 | 2        | Cosmopolitan | QQ832621         | Vietnam | 2019            | DENVN19_078 |
|                                 | 2        | Cosmopolitan | QQ832622         | Vietnam | 2019            | DENVN19_089 |
|                                 | 2        | Asian-I      | QQ832623         | Vietnam | 2019            | DENVN19_143 |
|                                 | 2        | Cosmopolitan | QQ832624         | Vietnam | 2020            | DENVN20_107 |
|                                 | 2        | Cosmopolitan | QQ832625         | Vietnam | 2020            | DENVN20_113 |
|                                 | 2        | Asian-I      | QQ832626         | Vietnam | 2020            | DENVN20_118 |
|                                 | 2        | Asian-I      | QQ832627         | Vietnam | 2020            | DENVN20_127 |



**Table S3.** The model-fit comparison of the log marginal likelihood estimation (MLE) using path sampling (PS) and stepping-stone sampling (SS).

| Clock Model                | log marginal Likelihood |          |
|----------------------------|-------------------------|----------|
|                            | PS                      | SS       |
| Strict clock               | -9966.96                | -9971.40 |
| Uncorrelated relaxed clock | -9970.85                | -9973.69 |

**Figure S1.** Temporal signal analysis of regression of root-to-tip divergence against date.

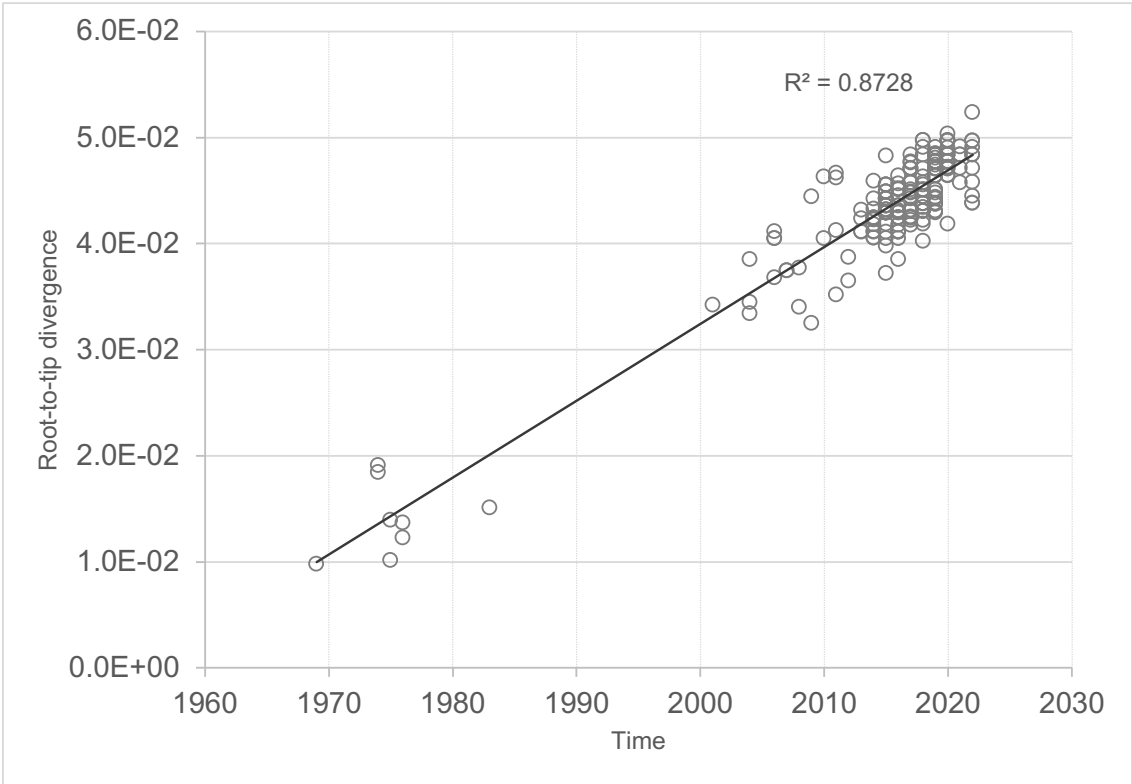

**Figure S2.** Phylogenetic tree of Vietnam strains from 1988-2022. The envelope sequences of 760 Vietnam DENV-2 strains from 1988-2022 and DENV-2 genotype reference strains were constructed for the Maximum Likelihood tree under TIM2+F+I+G4. The DENV-2 genotypes and the Bootstrap (>80%) are indicated at the adjacent branch. The tree branch is colored corresponding to geno-types. Vietnam taxa from a public database and obtained in the present study are labeled in blue and red, respectively.

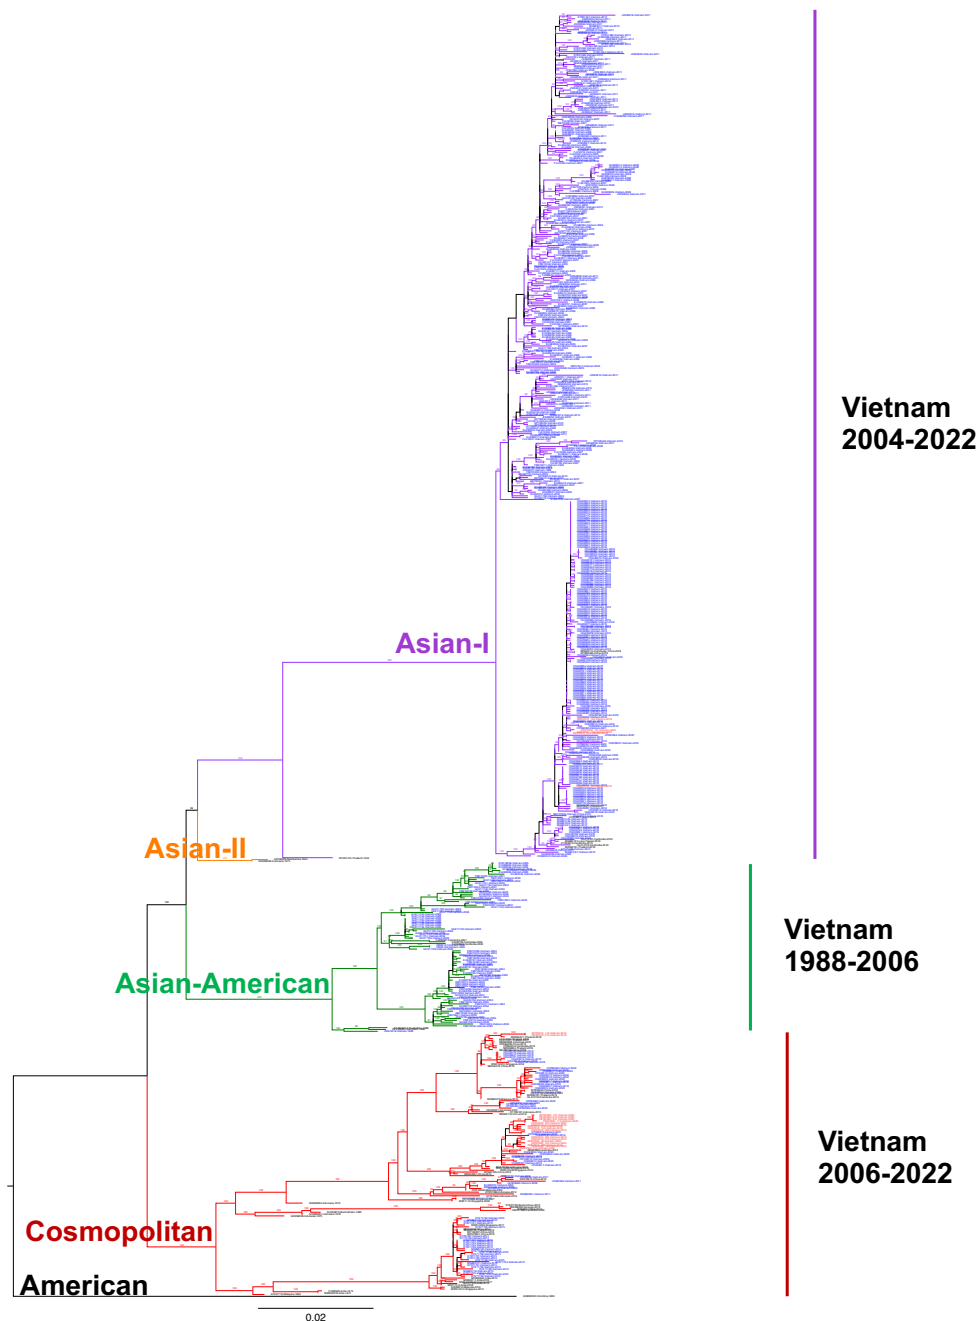

Supplement: s1 [file s1]
